# Supplementary material for: Enhanced Morphological Characterization of Cellulose Nano/Microfibers through Image Skeleton Analysis
Source: MDPI journal article supplement (doi:10.3390/nano11082077), 2021-08-16
Supplement: s1 [file s1]

# Enhanced Morphological Characterization of Cellulose Nano/Microfibers through Image Skeleton Analysis

Jose Luis Sanchez-Salvador <sup>1</sup>, Cristina Campano <sup>1</sup>, Patricio Lopez-Exposito <sup>2</sup>, Quim Tarrés <sup>3</sup>, Pere Mutjé <sup>3</sup>, Marc Delgado-Aguilar <sup>3</sup>, M. Concepcion Monte <sup>1</sup> and Angeles Blanco <sup>1,\*</sup>

<sup>1</sup> Department of Chemical Engineering and Materials, Complutense University of Madrid. Avda. Complutense s/n, 28040 Madrid, Spain; josanc03@ucm.es (J.L.S.-S.); ccampano@ucm.es (C.C.); cmonte@ucm.es (M.C.M.)

<sup>2</sup> Departamento de Bioingeniería e ingeniería Aeroespacial, Universidad Carlos III de Madrid, Avda. de la Universidad 30, 28911 Leganés, Spain; palopeze@pa.uc3m.es

<sup>3</sup> Group LEPAMAP, Department of Chemical Engineering, University of Girona, C/M. Aurèlia Campmany 61, 17071 Girona, Spain; joaquimagusti.tarres@udg.edu (Q.T.); pere.mutje@udg.edu (P.M.); m.delgado@udg.edu (M.D.-A.)

\* Correspondence: ablanco@ucm.es; Tel.: +34-913-944-247

**Table S1.** Cationic demand of CNFs and microfibers after homogenization.

|          |     | Eucalyptus<br>( $\mu\text{eq/g}$ ) | Pine ( $\mu\text{eq/g}$ ) | Sisal ( $\mu\text{eq/g}$ ) | Jute ( $\mu\text{eq/g}$ ) | Hemp ( $\mu\text{eq/g}$ ) |
|----------|-----|------------------------------------|---------------------------|----------------------------|---------------------------|---------------------------|
| Refining | PS1 | 184                                | 154                       | 131                        | 155                       | 134                       |
|          | PS3 | 208                                | 188                       | 163                        | 182                       | 168                       |
|          | PS5 | 215                                | 210                       | 199                        | 209                       | 205                       |
| E80      | PS1 | 204                                | 181                       | 168                        | 186                       | 151                       |
|          | PS3 | 216                                | 203                       | 194                        | 208                       | 184                       |
|          | PS5 | 232                                | 213                       | 214                        | 220                       | 210                       |
| E240     | PS1 | 200                                | 192                       | 176                        | 204                       | 162                       |
|          | PS3 | 224                                | 206                       | 203                        | 223                       | 200                       |
|          | PS5 | 250                                | 219                       | 226                        | 233                       | 221                       |
| T5       | PS1 | 1023                               | 1009                      | 925                        | 995                       | 938                       |
|          | PS3 | 1188                               | 1119                      | 1035                       | 1068                      | 1078                      |
|          | PS5 | 1277                               | 1201                      | 1098                       | 1135                      | 1088                      |
| T15      | PS1 | 1594                               | 1598                      | 1614                       | 1541                      | 1599                      |
|          | PS3 | 2012                               | 1774                      | 1863                       | 1808                      | 1801                      |
|          | PS5 | 2059                               | 1909                      | 2005                       | 2014                      | 1991                      |

**Table S2.** Carboxyl content of CNFs and microfibers after each pretreatment.

|                                                    | <b>Eucalyptus (μeq/g)</b> | <b>Pine (μeq/g)</b> | <b>Sisal (μeq/g)</b> | <b>Jute (μeq/g)</b> | <b>Hemp (μeq/g)</b> |
|----------------------------------------------------|---------------------------|---------------------|----------------------|---------------------|---------------------|
| Refining                                           | 44                        | 53                  | 42                   | 47                  | 54                  |
| Enzymatic Hydrolysis<br>80 mg enzyme / kg pulp     | 45                        | 53                  | 42                   | 47                  | 54                  |
| Enzymatic Hydrolysis<br>240 mg enzyme / kg pulp    | 45                        | 53                  | 42                   | 47                  | 54                  |
| TEMPO-mediated oxidation<br>5 mmol NaClO / g pulp  | 821                       | 816                 | 742                  | 758                 | 821                 |
| TEMPO-mediated oxidation<br>15 mmol NaClO / g pulp | 1385                      | 1374                | 1371                 | 1295                | 1363                |

### Initial Images

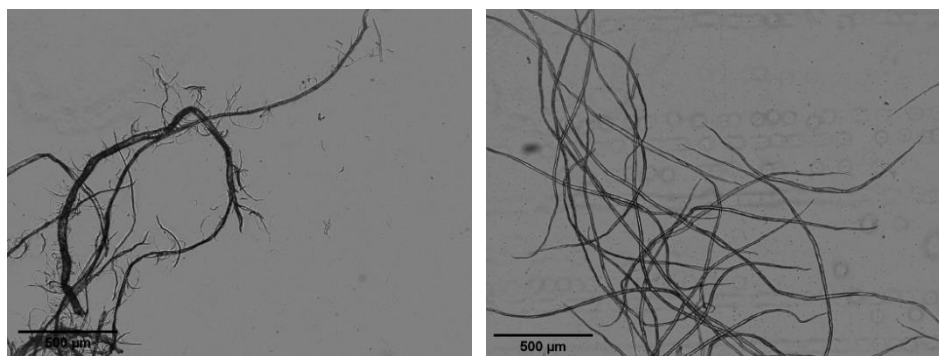

### Binary Images

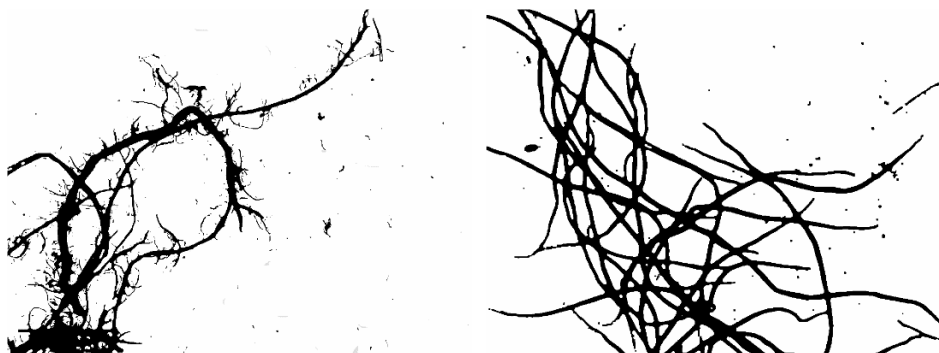

### Skeleton Images

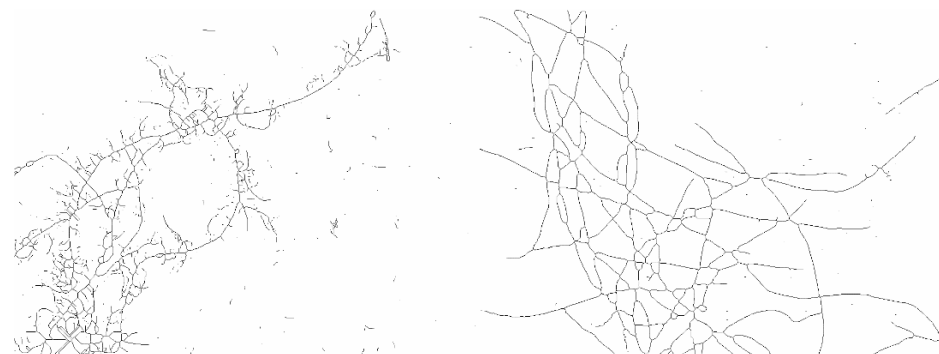

### Skeleton analysis

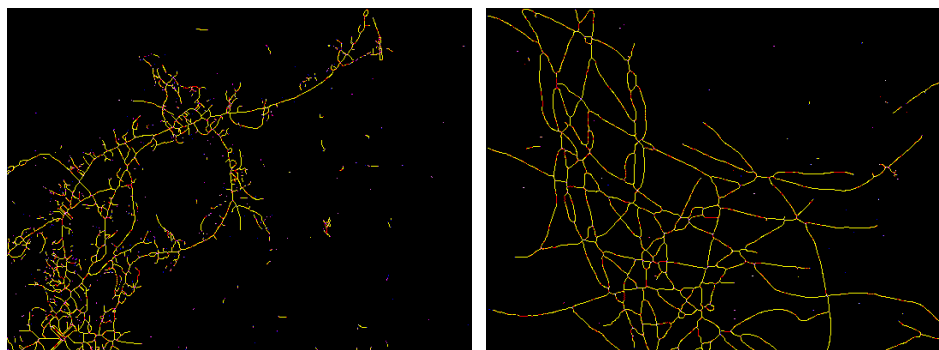

**Nodes 413**

**Branches 761**

**Nodes 187**

**Branches 305**

**Figure S1.** Example of image skeletonization of the fibers.

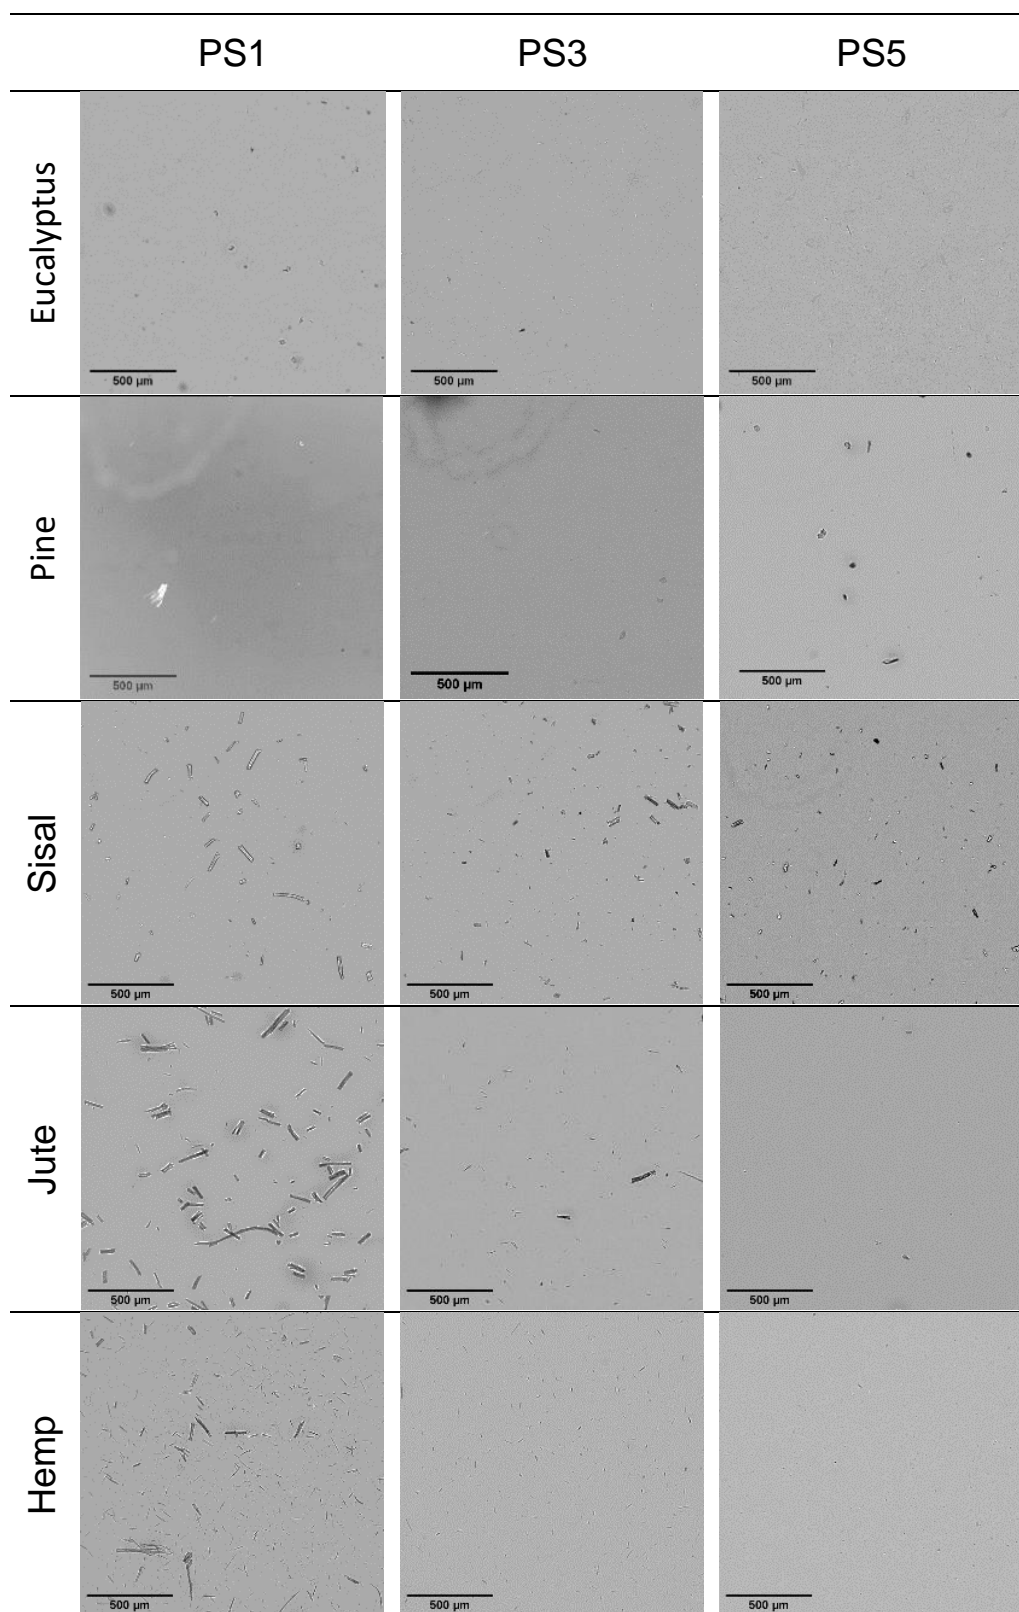

**Figure S2.** Optical Microscopy (OM) of cellulose nanofibers (CNF) pretreated with TEMPO-mediated oxidation and 15 mmol of NaClO/g pulp and different homogenization sequences.

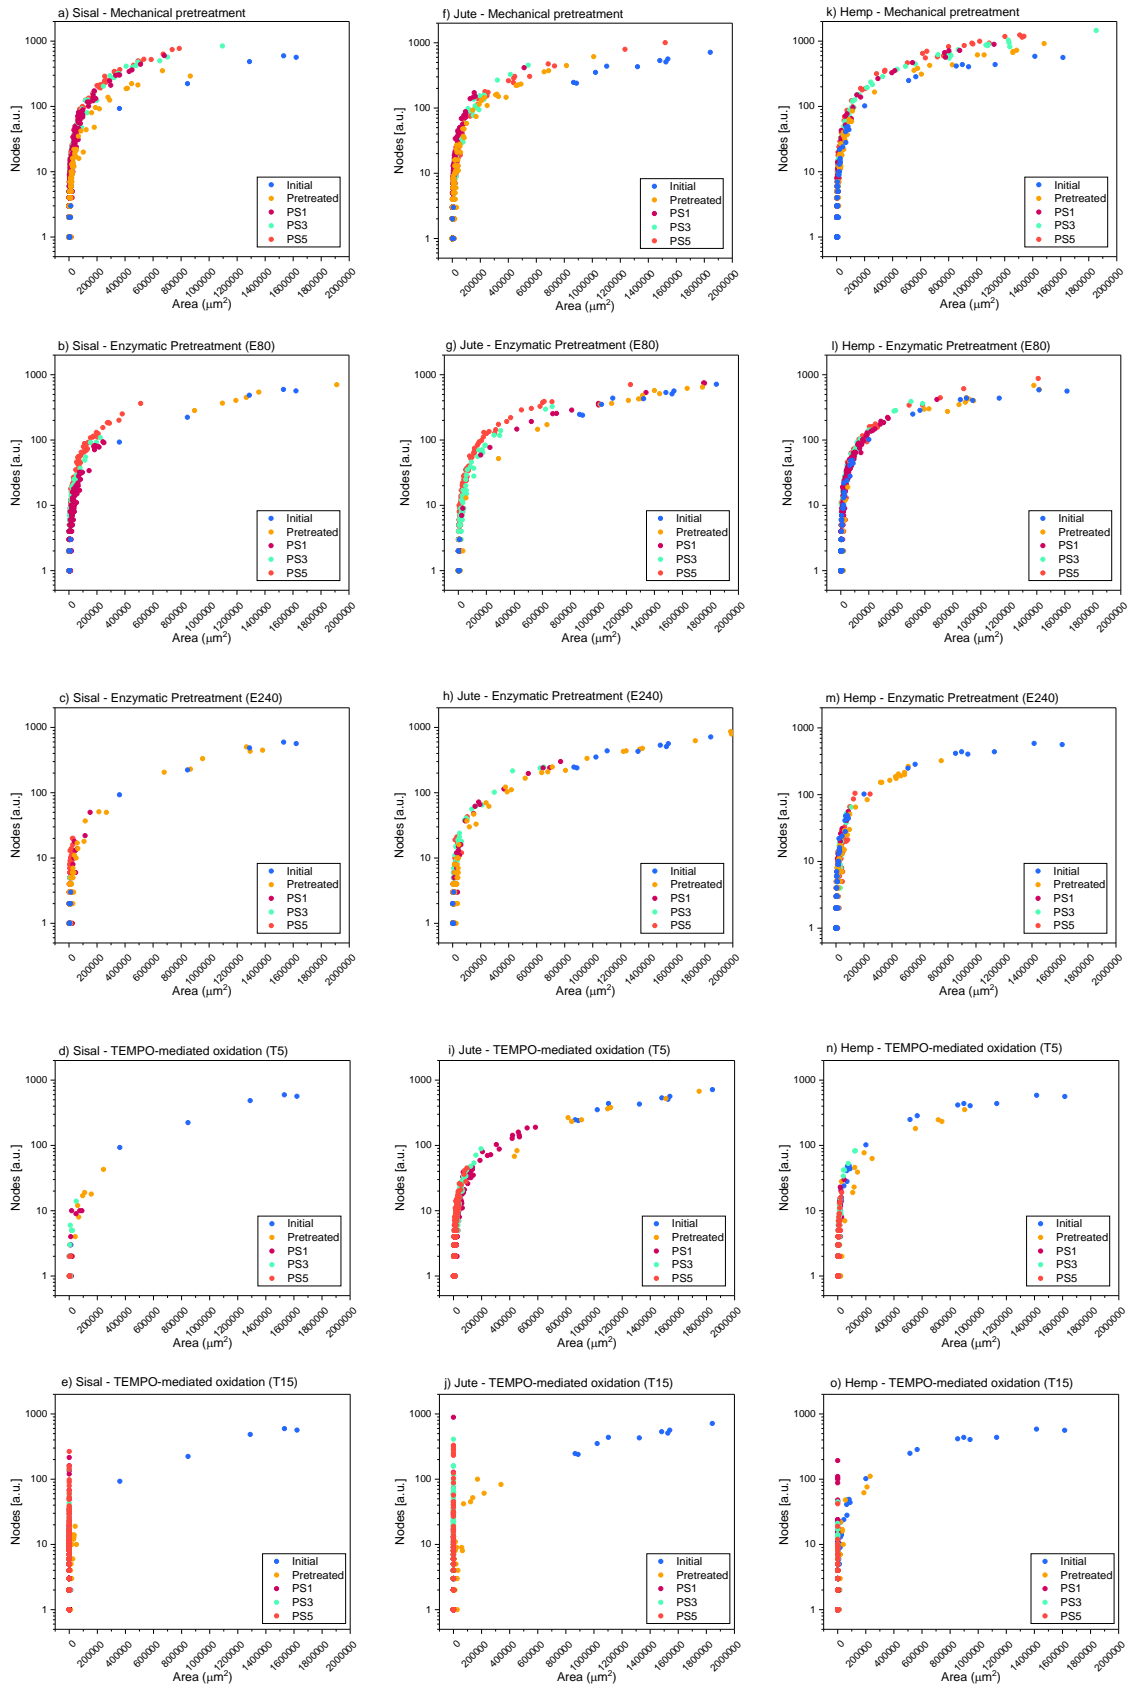

**Figure S3.** Evolution of the number of nodes quantified in the elements identified in the microscopy images with their projected area, when different pretreatments and pressure sequences are used to produce sisal, jute and hemp cellulose nanofibers.
